# Supplementary material
Source: PubMed Central journal article supplement (PMC9175618)
Supplement: jvi.00634-22-s0001.pdf [file jvi.00634-22-s0001.pdf]

**Table Supplementary 1. Quantitative PCR primer sequence**

| Gene        | Sequence (5' - 3') sense, antisense               | Gene     | Sequence (5' - 3') sense, antisense               |
|-------------|---------------------------------------------------|----------|---------------------------------------------------|
| ADAR1       | GATGGAATACCCACAGGCTTAT<br>TAAATTCAGGAGGCCACTAAC   | IFNLX1/2 | TGACCACCTGGTTACCTACA<br>CCAGGAA TCTCA TGTCCTCAATC |
| APOBEC2     | CCCTGCTTCTTCTTTCATGTTTC<br>TATTTGAGCCTCAGGCTTTTCC | Irf1     | AGAAGGAGACCGACCCTAAA<br>CTGCACTAGGAGCCTTTGTAT     |
| BST1        | TACACTCGCTGGTTGGATTG<br>AATGCCTCCTGTGGGTTATTT     | Irf2     | GGAGAATTGCCTCTCCCTTAC<br>GGTCTTGTGGGAGCTATTT      |
| CSF1        | CTCTGTCCAAGCTGGATGATT<br>GCCTTATTCATCCCATGTGTTTC  | Irf3     | GCCTGATTTGGATGAATGAAGAAA<br>CAATAGCCCAGCCCTCAAATA |
| CSF3        | AGGCATAACAGCCGAGAAC<br>GTCGGAAAGGATGAGGAACAT      | Irf4     | CTGGTGAGGCTATTCCATTCTC<br>GTGAGATCCTGCAACCTTCTT   |
| ERV 3-1     | CTTGCGATCTGTCTGTTGA<br>GGTAACACTGATCTGGGCTAAG     | Irf5     | GACAAGATGGTGGAGCAGTTTA<br>CACACTCAGGGTTGGGTATTG   |
| ERV K-18    | GCAAGAATGAGTGGCGATTG<br>CATCTGGTGAATCTGGCTAAA     | Irf6     | TGGTGGCTCAGGTAGATAGT<br>CTATGCCTTGTGGCATGTTTC     |
| ERV K-113   | ACTGGAGAAGGAGGTTCTAGTC<br>AGCCAGGTAGTGAGTCCTTTA   | Irf7     | GATCCACCTAACCAAGACCATC<br>CCCTGGATTTGCCTACTCTTT   |
| FV3 DNA pol | CAAGAACGTGTGCTACTCCA<br>AGCCTCTGACTCTACCTTC       | Irf8     | GAGAGGCGTCCTTGTAAAG<br>TTCGAGCTTTGTGGTCTATC       |
| GAPDH       | ACCCCTTCATCGACTTGGAC<br>AGA TGGAGGAGTGAGTGCACCAT  | Irf9     | CATGACGAGGATCGACTATT<br>CAAGGCACAACGAGTCTA        |
| Gbp1        | TCTTCTGGTGGTCTCTTAGT<br>CAAGGACAGCATTCTCCATACA    | Mx1      | GAGCAGAGTCAGATGTTGTGAG<br>CAGCGAAAGGTTCTCCTGTATC  |
| IFITM1      | CCAAGCATTATGCCTCAACATC<br>ATGGCCTTGTCCCACTATTC    | Nfkb     | CTCAGCAACAACTCTTCTG<br>AGGGAAGCATCCTAAGATT        |
| IFIT1b      | CTAGAACCAGACAGATCTTC<br>GCCTTCTTCAGGACTCCAATAG    | PKR      | GATCTCAGATGTCGAGTTTGT<br>TCTGGTTTCTGGCTCTCTAAAC   |
| IFN7        | TCTGTAGGAAGTCTCCGAAGTA<br>CACATTCAAGTTGGAACCTTTC  | Rig1     | ATAGGACGAAGCAAGAGGAATG<br>AGCAACTGAGGTAGCAATCAA   |
| IFNX6       | CAGTCCATCTCTCACACTAAC<br>CGCTTGATCCTGTGCTTGTGA    | SOCS3    | GCGCAAACTCCAAGAAAGTG<br>TCAGAGCTGTCTCGGATAAGA     |
| IFNX11      | CATGCCAACAACTGGTTTCTC<br>AATGCTGAGCCTCTGAAGATT    | TRIM28   | CACATGTGGCCAGTGTAGAA<br>GAGGTGAGATCCTGGCATAAC     |
| IFNX13      | TGCAAGAGGCTTGGACTTAC<br>ATCCTTATATGCGACCGTGTATG   | TNF      | TGTCAGGCAGGAAAGAAGCA<br>CAGCAGAGCAAAGAGGATGGT     |
| IFNX20      | CATGGTGGTGCATACAGTCTAC<br>CCTCCAGAAGGGAACGTAGATA  | VIPERIN  | ACTCCGACCAGTGTGAATTATC<br>CCTCGCTTGGCTTCTTCTAT    |
| IFNL3       | GTCCTTTCAGCGATGGGATAA<br>ACGGCTTATGGCGAAACA       | Xen1     | TCGTTCCGGAATCACTCCTTTG<br>AATGGACGTTGAGGCGATAC    |

**Table Supplementary 2. Sequences of cloning primers**

| Primer     | Sequence (5' - 3')                         |
|------------|--------------------------------------------|
| pcDNA3_fwd | CTCGAGTACTCCGGTATTG                        |
| pcDNA3_rev | GGTGGCAAGCTTAAGTTAAAC                      |
| Xen1_fwd   | TTAAACTTAAGCTTGCCACCATGTCATGCTCTAATTGTG    |
| Xen1_rev   | GCAATACCGGAGTACTCGAGCTAAAGGTATGACAAAAGGTTT |

**Table Supplementary 3: Primers used for sgRNA production**

| Gene target   | Sequence (5' - 3')                                                      |
|---------------|-------------------------------------------------------------------------|
| <i>csf3.s</i> | <b>AATTTAATACGACTCACTATA</b> <u>GGGGATAAAACTCCCGGAGGTTTTAGAGCTAGAAA</u> |
| <i>csf3.l</i> | <b>AATTTAATACGACTCACTATA</b> <u>GGCCTCTCAGCTCCCTCCCGTTTTAGAGCTAGAAA</u> |

Bold region depicts the T7 promoter region, underline nucleotides are added for improved mutagenic activity, italicized nucleotides are universal reverse.

**Table Supplementary 4: List of primers used for genotyping**

| Gene target   | Sequence (5' - 3') sense, antisense           |
|---------------|-----------------------------------------------|
| <i>csf3.s</i> | TGTGTGTAGCATCTCTTGGG<br>CCATGTGAGGGTTACCAGATC |
| <i>csf3.l</i> | CAAAGGGAAATGATAGGAGG<br>GCTCTGATGCCACATAGGTA  |

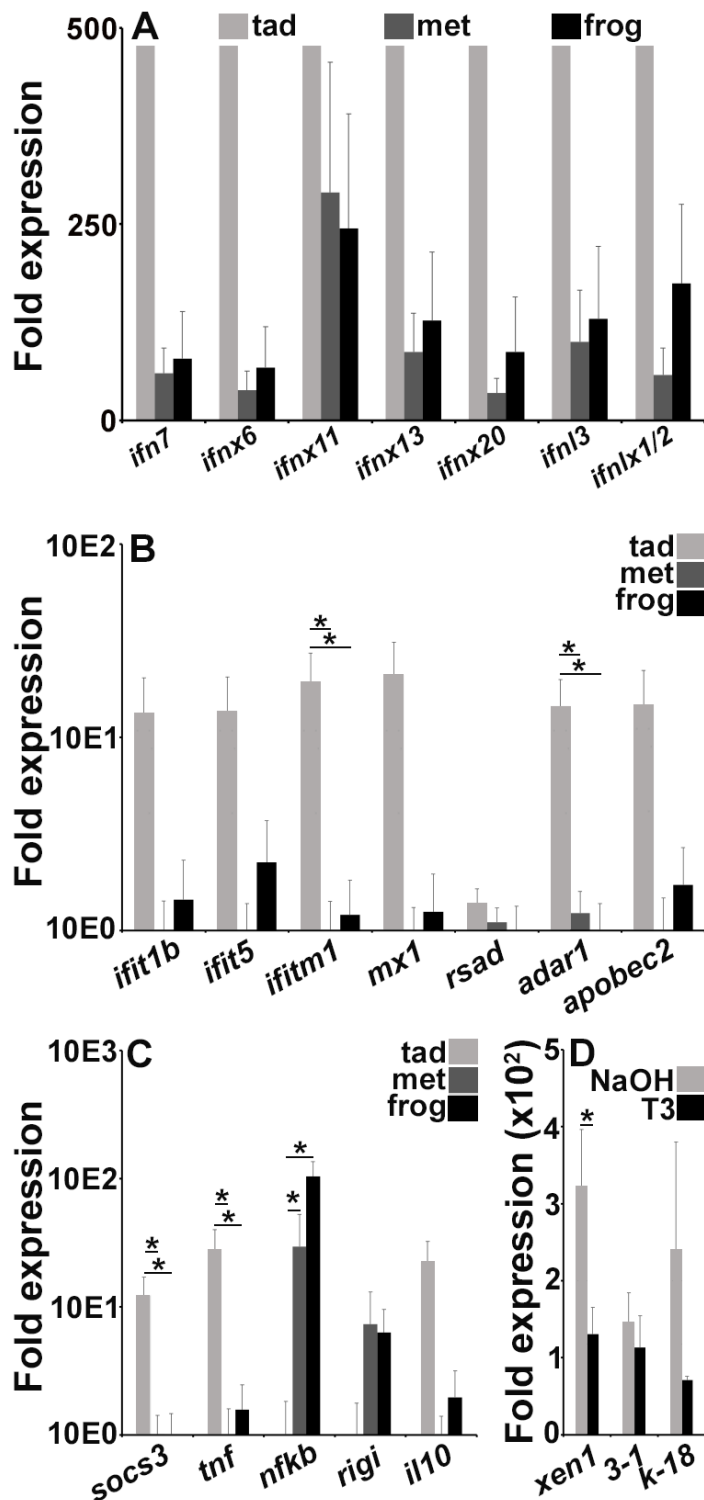

**Figure Supplemental 1.** Baseline and T3 induced immune gene expression in tadpole kidneys. Tadpoles and froglet kidneys were compared for expression of (A) antiviral and (B) immunomodulatory genes (N=6/group). (C) Tadpoles were reared in water containing T3 (10 nM final concentration) or solvent control (NaOH) for 5 days and their kidney expression of ERVs was subsequently assessed (N=6). The results are means + SEM. All gene expression was assessed relative to the *gapdh* endogenous control. Asterisks (\*) above lines indicate statistical differences between treatment groups indicated by those lines.

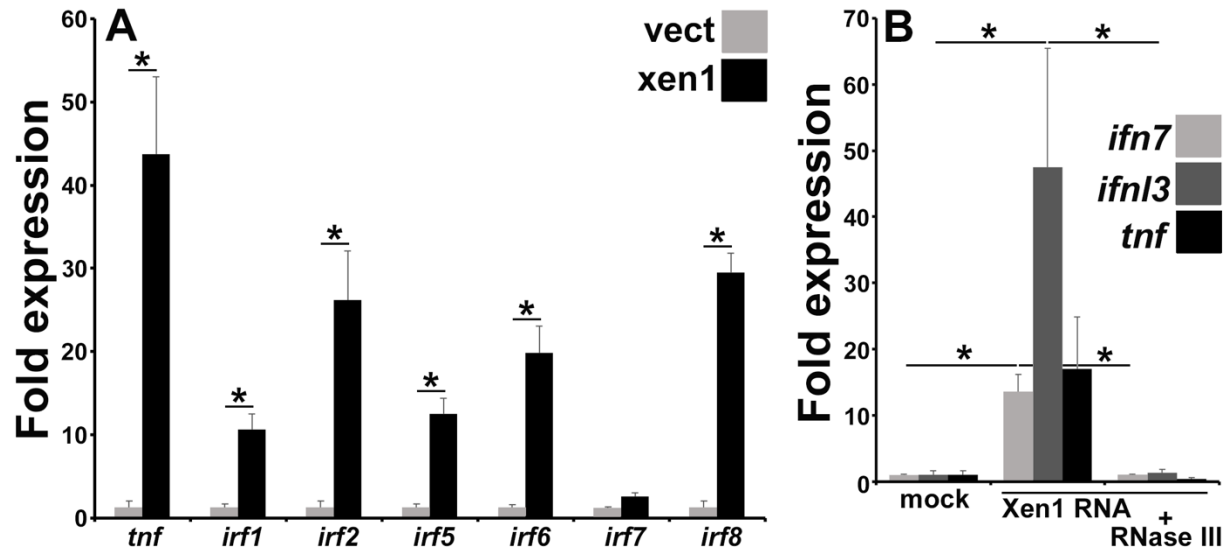

**Figure Supplemental 2.** Xen1 induces antiviral and innate immune gene expression in A6 cells. (A) TNF and IRF gene expression in A6 cells transfected with a Xen1 expression construct or an empty expression vector (vect;  $N=6$ ). (B) IFN and TNF gene expression in mock-transfected (mock) A6 cells and A6 cells transfected Xen1 ORF1 RNA that had or had not been digested with RNase III, which specifically cleaves dsRNA ( $N=4$ ). The results are means + SEM. In (A) All gene expression (C) was assessed relative to the *gapdh* endogenous control. Asterisks (\*) above lines indicate statistical differences between treatment groups indicated by those lines.

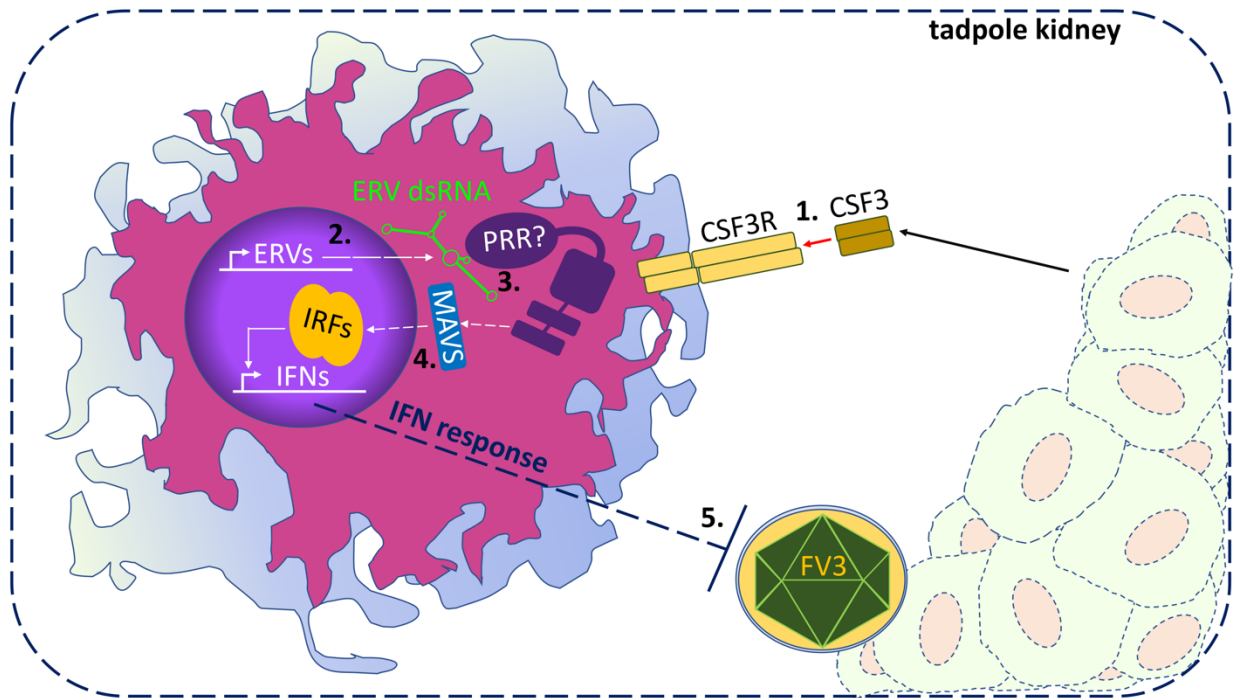

**Figure Supplemental 3.** Schematic of proposed mechanisms of antiviral protection by tadpole kidney-resident myeloid cells (1.) Large esterase-positive myeloid cells are homed and/or retained in the tadpole kidney by CSF3, which is produced by kidney cells and/or other resident leukocytes. (2.) These myeloid cells possess robust expression of ERVs, which results in the production of dsRNA. (3.) The ERV-derived dsRNA is detected by (an unknown) intracellular pattern recognition receptor(s) (PRR), which signal through MAVS and presumably activate IRFs. (4.) The activated IRFs facilitate the increased expression of antiviral IFN (and other innate immune) genes within the large myeloid cells. (5.) The antiviral IFNs (and other innate immune effectors) produced by the large myeloid cells result in a heightened antiviral state within tadpole kidneys, thereby rendering them less susceptible to FV3.
